# Supplementary material for: Compensation effect and volcano curve in toluene hydrogenation catalyzed by transition metal sulfides
Source: Royal Society of Chemistry journal article supplement (doi:10.1039/c001069c), 2010-01-01
Supplement: c001069c.pdf [file c001069c.pdf]

## SUPPORTING INFORMATION

### S1: Determination of the apparent activation energies, prefactor and Constable plot as a function of temperature

a)

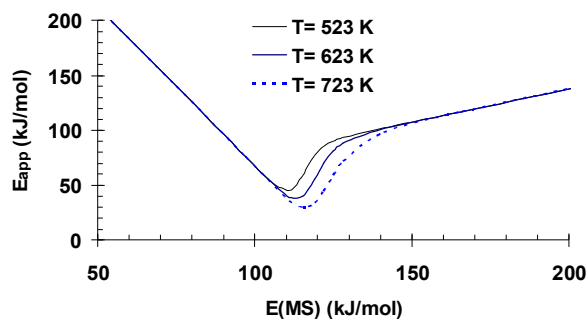

b)

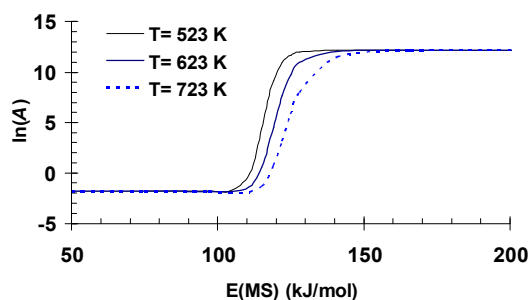

c)

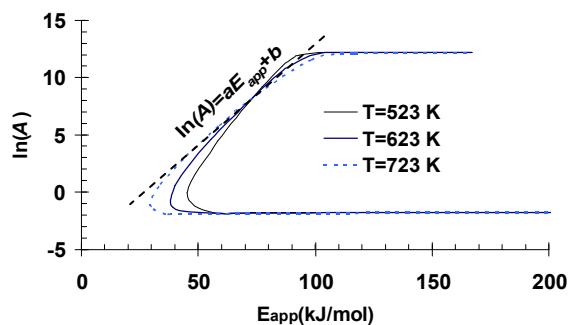

As expected, we show in Figure a) that an increase of temperature leads to a decrease of the apparent activation energies whatever the value of  $E(MS)$ . Moreover, the minimum is shifted towards higher  $E(MS)$  values. Following the Le Chatelier principle, an increase of  $T$  induces a depletion of the reactive species from the catalytic surface and thus, the optimal catalyst will be the one counteracting this effect, i.e. a catalyst with higher  $E(MS)$ . In contrast, the apparent prefactor decreases as a function of  $T$  for a given  $E(MS)$ .

In Figure c) the compensation effect is highlighted as a function of  $T$ : the calculated value of  $a$  is close to  $1/RT$  and thus directly depend on  $T$  variation.
